# Supplementary material for: An efficient low-cost and facile ITO interdigital micro-photodetector based on mixed cationic perovskites for screening new optoelectronic materials
Source: Royal Society of Chemistry journal article supplement (doi:10.1039/d3nj01742g), 2023-01-01
Supplement: d3nj01742g1.pdf [file d3nj01742g1.pdf]

## Electronic Supplementary

### Information(ESI)

**Title: Efficient low-cost and facile ITO interdigital micro-photodetector based on mixed cationic perovskite for screening new optoelectronic materials**

Mengqing Li,<sup>a</sup> Wenhuan Cao,<sup>a</sup> Xiangfei Min,<sup>a</sup> Wenhui Li,<sup>a</sup> Xueze Wang,<sup>a</sup> Huidan Gao,<sup>a</sup> Huawei Zhou,<sup>a,\*</sup> Jie Yin,<sup>a</sup> and Xianxi Zhang<sup>a,\*</sup>

<sup>a</sup> *School of Chemistry and Chemical Engineering. College of Materials Science and Engineering. Shandong Provincial Key Laboratory/Collaborative Innovation Center of Chemical Energy Storage. Liaocheng University.*

\*E-mail: zhouhuaweiopv@163.com. xxzhang3@126.com

**This PDF file includes:**

Experiment section.....3  
    Fabrication of MCPs devices: .....3  
    Fabrication of MASnBrCl<sub>2</sub> devices: .....3  
Characterization .....3  
    Scanning electron microscopy (SEM): .....3  
    X-ray diffraction (XRD): .....3  
    Photocurrent density-time performance (J-t): .....3  
    Linear sweep voltammetry (LSV): .....4  
    Incident monochromatic photon-electron conversion efficiency (IPCE): .....4  
    Contact angle test:.....4  
    Responsivity (R): .....4  
    Detectivity (D): .....4  
Supplementary Figures .....4  
Supplementary Table .....5

## Experiment section

### Fabrication of MCPs devices:

A layer of  $\text{Cs}_{0.1}(\text{MA}_{0.15}\text{FA}_{0.85})_{0.9}\text{Pb}(\text{Br}_{0.14}\text{I}_{0.86})_3$  was deposited on the dried ITO interdigital electrode.

The  $\text{Cs}_{0.1}(\text{MA}_{0.15}\text{FA}_{0.85})_{0.9}\text{Pb}(\text{Br}_{0.14}\text{I}_{0.86})_3$  precursor solution was prepared by dissolving CsI (18.2 mg), MABr (23.5 mg),  $\text{PbBr}_2$  (77.1 mg), FAI (204.6 mg),  $\text{PbI}_2$  (606.7 mg) in 1 mL mixed solvent of DMF and DMSO (4:1 in volume ratio). The ITO substrate was treated with UV-ozone for 10 min before the deposition of perovskite. The perovskite precursor solution was spin-coated on the ITO substrate at 3000 rpm for 30 s and 6000 rpm for 30 s. Antisolvent chlorobenzene was quickly dripped onto the perovskite film at 50 s. The perovskite film was annealed at 100 °C for 50 min.

### Fabrication of $\text{MASnBrCl}_2$ devices:

1 M MABr and 1 M  $\text{SnCl}_2$  were dissolved in a mixed solvent of DMF and DMSO (volume ratio 4:1) to prepare the  $\text{MASnBrCl}_2$  perovskite precursor solution. The preparation conditions of  $\text{MASnBrCl}_2$  film are the same as those of MCP film.

## Characterization

### Scanning electron microscopy (SEM):

The morphology of MCPs samples was studied by scanning electron microscope (Thermo Fisher Scientific FIB-SEM GX4, USA) at 10 kV and 43 pA emitter current and a working distance of 4.5 mm. The element content and element mapping of MCPs were measured by an Energy Dispersive Spectroscopy (EDS, Bruker) equipped with SEM. The detection element was X-ray excited by electron beams of 10 kV and 43 pA.

### X-ray diffraction (XRD):

A high-resolution diffractometer (SmartLab 9 kW, Rigaku, Japan) equipped with a 2D matrix high-speed detector was used to record the XRD pattern of MCPs using a  $\text{Cu K}\alpha$  ( $\lambda = 1.54 \text{ \AA}$ ) radiation source moved from 5 ° to 70 ° (scanning step: 0.01 °, scanning rate: 20 °/min) at 45 kV and 200 mA.

### Photocurrent density-time performance (J-t):

A photoelectrochemical workstation system (ZAHNER CIMPS-2 pro, Germany) was used to test the photocurrent density-time performance of MCPs ITO-IEs with different wavelengths (386, 397, 405, 433, 454, 480, 511, 537, 564, 591, 630, 656, 708, 726, 764, 801, and 820 nm) under different light intensities at different voltages (0, 0.5, 1, 1.5, 2, and 2.5 V). The test parameters are as follows:

recording time: 20 s, light period time: 1 s. The effective light-receiving area of the MCPs ITO-IEs is 0.04 cm<sup>2</sup>.

### Linear sweep voltammetry (LSV):

The linear sweep voltammetry (LSV) of MCPs ITO-IEs with different wavelengths (386, 397, 405, 433, 454, 480, 511, 537, 564, 591, 630, 656, 708, 726, 764, 801, and 820 nm) at 30 W/m<sup>2</sup> light intensity was tested using a photoelectrochemical workstation system (ZAHNER CIMPS-2 pro, Germany). The scanning rate of LSV is 100 mV s<sup>-1</sup>, and the scanning range is -2.5 V~2.5 V (absolute value).

### Incident monochromatic photon-electron conversion efficiency (IPCE):

The IPCE of MCPs ITO-IEs at 80% light intensity was tested at different wavelengths (365-1020nm) using a photoelectrochemical workstation system (ZAHNER CIMPS-2 pro, Germany).

### Contact angle test:

The contact angle of FTO and ITO conductive glass was measured by a contact angle measuring instrument (JC2000C1, China) using a DMF-DMSO mixed solution (4:1).

### Responsivity (R):

$$R = \frac{I_{PC} - I_{Dark}}{P \times S} \text{ (A W}^{-1}\text{)}$$

### Detectivity (D):

$$D = \frac{R}{\sqrt{2e \times I_{Dark}}} \text{ (Jones)}$$

P is the power intensity of incident light, S is the effective light-receiving area of the ITO-IEs, I<sub>PC</sub> is the current under light and I<sub>Dark</sub> is the dark current, e = 1.6×10<sup>-19</sup> C.

## Supplementary Figures

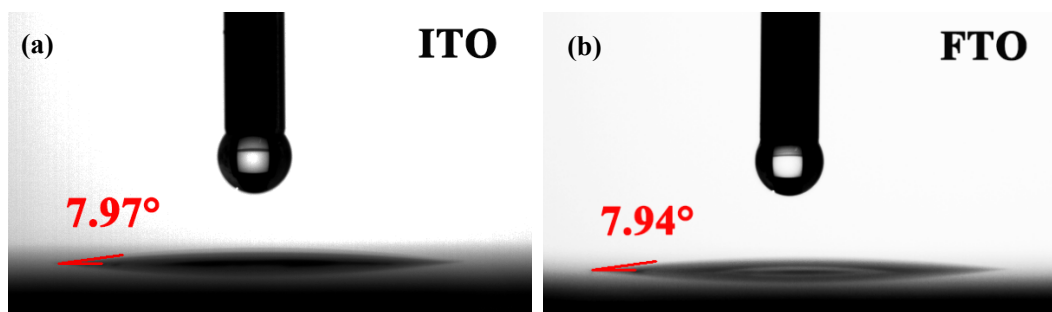

Fig. S1 The contact angle of water on the surfaces of ITO (a) and FTO (b).

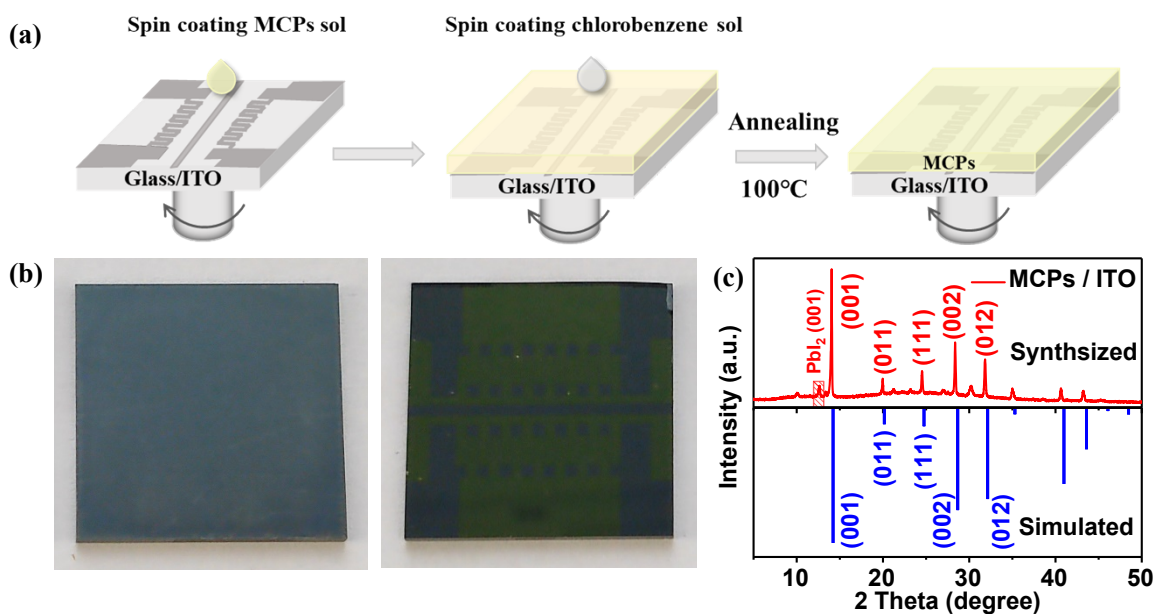

Fig. S2 (a) Schematic diagram of the preparation process of MCPs/ITO-IEs device. (b) Photos viewed along the perovskite sides (left), viewed along the glass sides (right). (c) The XRD patterns of MCPs thin films on the ITO-IE and the simulated XRD patterns by fitting the crystal data in the literature.

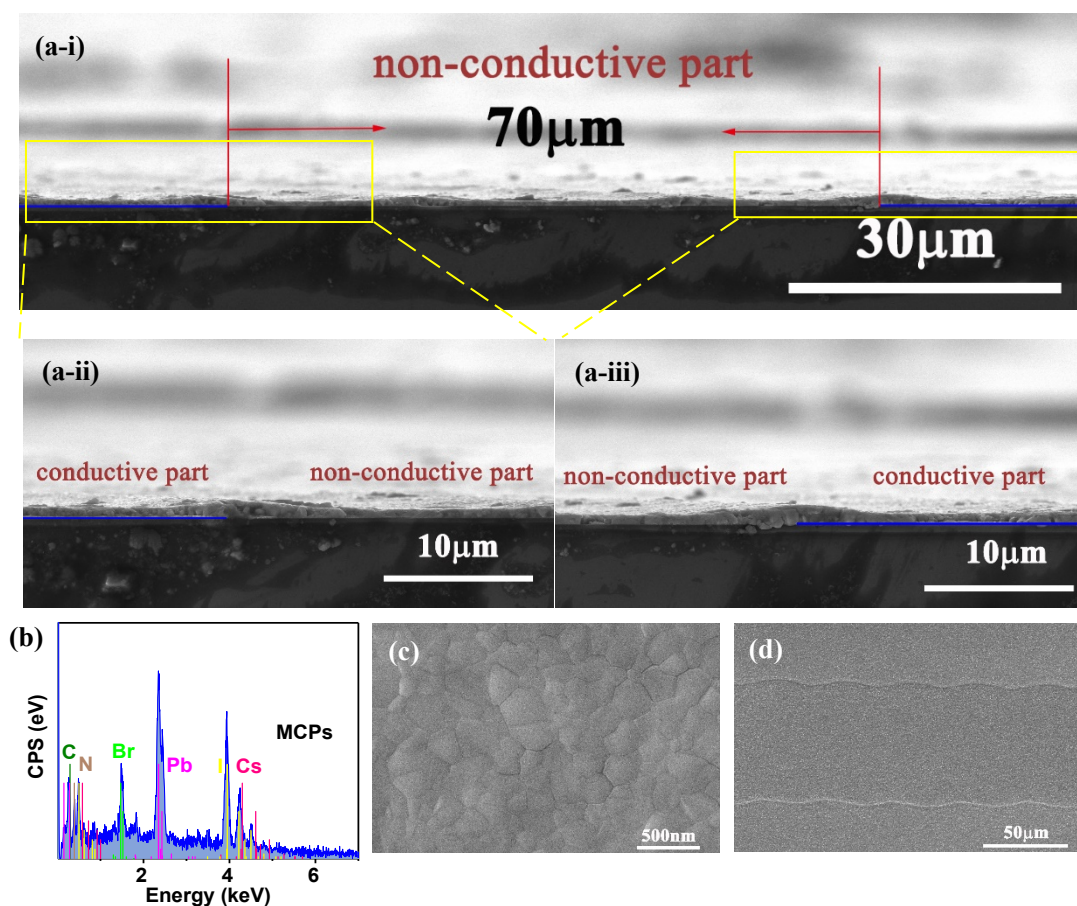

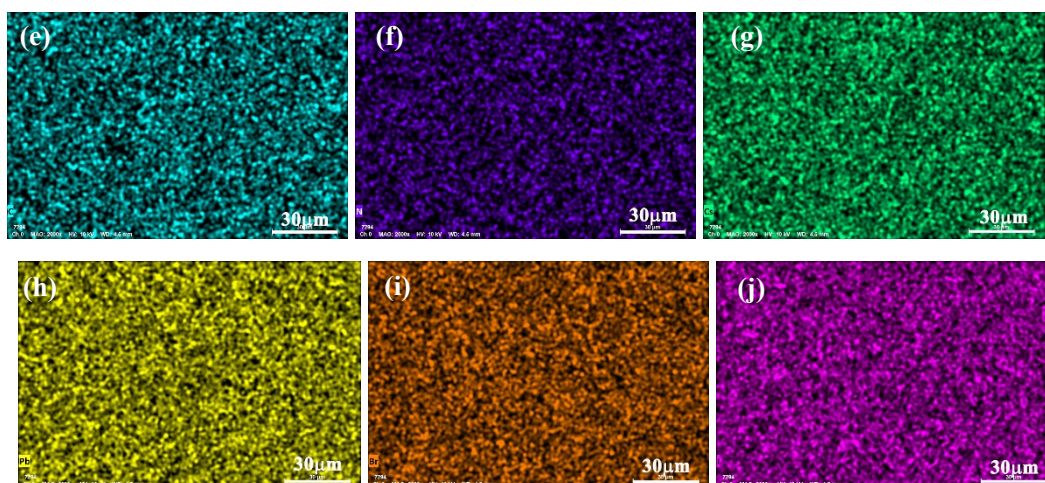

Fig. S3 (a) SEM images of the cross-section of the conductive and non-conductive parts of MCPs ITO-IEs. (b) EDS of MCPs film. (c) SEM images of MCPs films. (d) SEM image of MCPs film on the conductive and non-conductive part of the ITO-IEs. Element mapping of C (e), N (f), Cs (g), Pb (h), Br (i), and I (j) in MCPs.

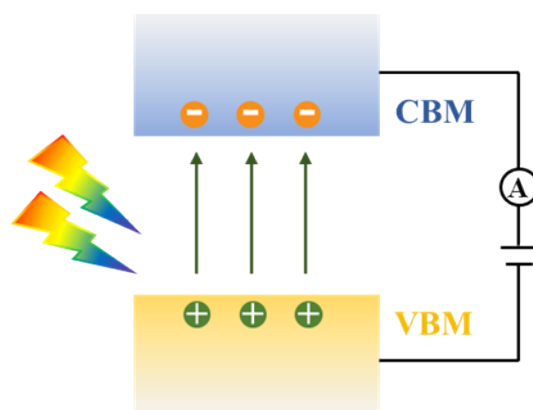

Fig. S4 Working mechanism diagram of MCPs ITO-IEs.

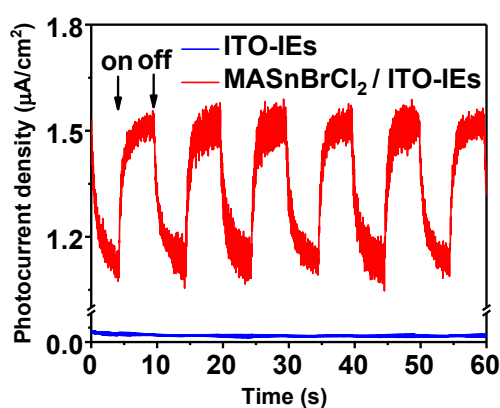

Fig. S5 J-t curves of MASnBrCl<sub>2</sub> ITO-IEs and ITO-IEs under white light with 500 mW/cm<sup>2</sup> and 1.5 V bias voltage.

## Supplementary Table

Table S1 Element content of MCPs film.

| Element | Normalized mass (%) | Atom (%) | abs. error (%) (1 sigma) |
|---------|---------------------|----------|--------------------------|
| C       | 1.91                | 15.74    | 0.48                     |
| N       | 2.38                | 16.79    | 0.63                     |
| Cs      | 0.23                | 0.17     | 0.08                     |
| Pb      | 32.4                | 15.48    | 1.12                     |
| Br      | 5.7                 | 7.06     | 0.32                     |
| I       | 57.39               | 44.76    | 1.88                     |
|         | 100                 | 100      |                          |

Table S2 Performance of reported perovskite interdigital electrode

| Electrode | Photodetector                                             | Responsivity<br>(R/mA W <sup>-1</sup> ) | Detectivity<br>(D/Jones)                                               | Applied<br>conditions                      | Reference |
|-----------|-----------------------------------------------------------|-----------------------------------------|------------------------------------------------------------------------|--------------------------------------------|-----------|
| Au        | CH <sub>3</sub> NH <sub>3</sub> PbI <sub>3</sub><br>film  | 1.60                                    | no calculation                                                         | 680 nm, 0.036<br>mW, 5 V                   | 17        |
| Au        | MAPbCl <sub>3</sub> SC                                    | 0.60 (100) plane<br>0.62 (110) plane    | <4×10 <sup>9</sup> (100)<br>plane<br><6×10 <sup>9</sup> (110)<br>plane | 10 V, 20 mW                                | 16        |
| Au        | CsCu <sub>2</sub> I <sub>3</sub> film                     | 49.22                                   | 2.49×10 <sup>12</sup>                                                  | 340 nm, 2 V                                | 18        |
| Au        | CsPbBr <sub>3</sub> film                                  | 0.24                                    | no calculation                                                         | 500 nm, 48.7<br>μW cm <sup>-2</sup>        | 19        |
| Au        | CH <sub>3</sub> NH <sub>3</sub> PbCl <sub>3</sub><br>film | 7560                                    | no calculation                                                         | 360 nm, 4 V                                | 20        |
| Au–Ag     | CH <sub>3</sub> NH <sub>3</sub> PbCl <sub>3</sub><br>SC   | 240                                     | 1.1 ×10 <sup>11</sup>                                                  | 415 nm, -30 V                              | 21        |
| Ag        | (PEA) <sub>2</sub> PbI <sub>4</sub><br>nanowires          | 2098                                    | 1.752×10 <sup>12</sup>                                                 | 4.99 μW cm <sup>-2</sup> ,<br>520 nm, -5 V | 22        |
| Cr        | CsPbI <sub>3</sub>                                        | no calculation                          | 9.2×10 <sup>9</sup>                                                    | 100 mW cm <sup>-2</sup> ,<br>5 V           | 23        |
| Cr-Au     | MAPbI <sub>3</sub>                                        | 140                                     | no calculation                                                         | 633 nm, 30<br>mW cm <sup>-2</sup>          | 24        |
| Cr        | CsPbBr <sub>3</sub> film                                  | 0.962                                   | 2.67 × 10 <sup>9</sup> cm<br>Hz <sup>-2</sup> W                        | 100 mW cm <sup>-2</sup> ,<br>5 V           | 25        |
| Au        | T-MAPbCl <sub>3</sub><br>SC                               | 0.0277                                  | no calculation                                                         | 395 nm, 1 W<br>m <sup>-2</sup> , 3 V       | 26        |
| ITO-IEs   | Cs <sub>0.1</sub> (MA) <sub>0.15</sub> F                  | 7.23                                    | 2.36×10 <sup>10</sup>                                                  | 386 nm, 30 W                               | This      |

---

$A_{0.85}I_{0.14}Pb(Br_0.86)_3$

---

$m^{-2}, 2.5 V$

work
